# Supplementary material for: Red electroluminescence of ruthenium sensitizer functionalized by sulfonate anchoring groups
Source: Royal Society of Chemistry journal article supplement (doi:10.1039/c3dt52949e), 2014-01-01

## Supplementary Information for

### **Red Electroluminescence of Ruthenium Sensitizer Functionalized by sulfonate Anchoring Groups**

**Hashem Shahroosvand<sup>a\*</sup>, Parisa Abbasi <sup>a</sup>, Ezeddin Mohajerani<sup>b</sup>, Mohammad Janghouri <sup>b</sup>**

<sup>a</sup>Chemistry Department, University of Zanjan, Zanjan, Iran.

<sup>b</sup>Laser and Plasma Research Institute, Shahid Beheshti University, Tehran, Iran.

## ESI, S1:

The proton labeling of ligands.

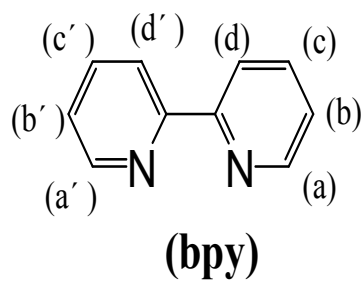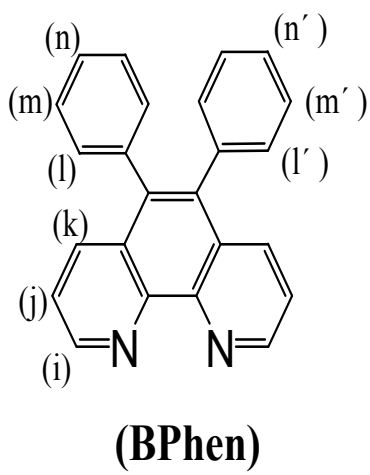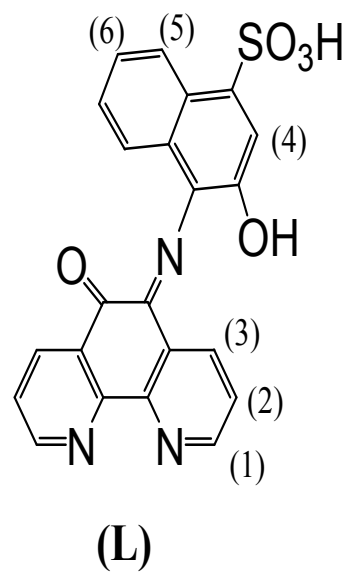

ESI, S2: Cyclic voltammetric curve for 1 mM (1) in a 0.05 M tetraethylammonium tetrafluoroborate/ DMF: working electrode Pt disk, diameter 125  $\mu\text{m}$ , T = 24°C, scan rate 1 V/s.

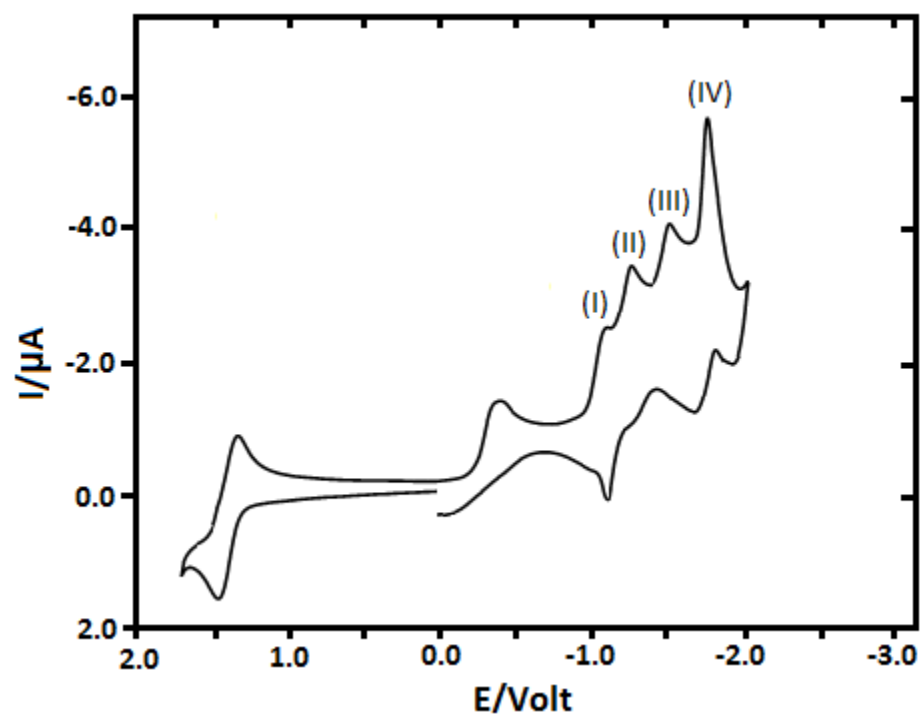

Supplement: c3dt52949e1.pdf [file c3dt52949e1.pdf]
